# Supplementary material
Source: PubMed Central journal article supplement (PMC4265475)
Supplement: NIHMS631163-supplement-8.pdf [file NIHMS631163-supplement-8.pdf]

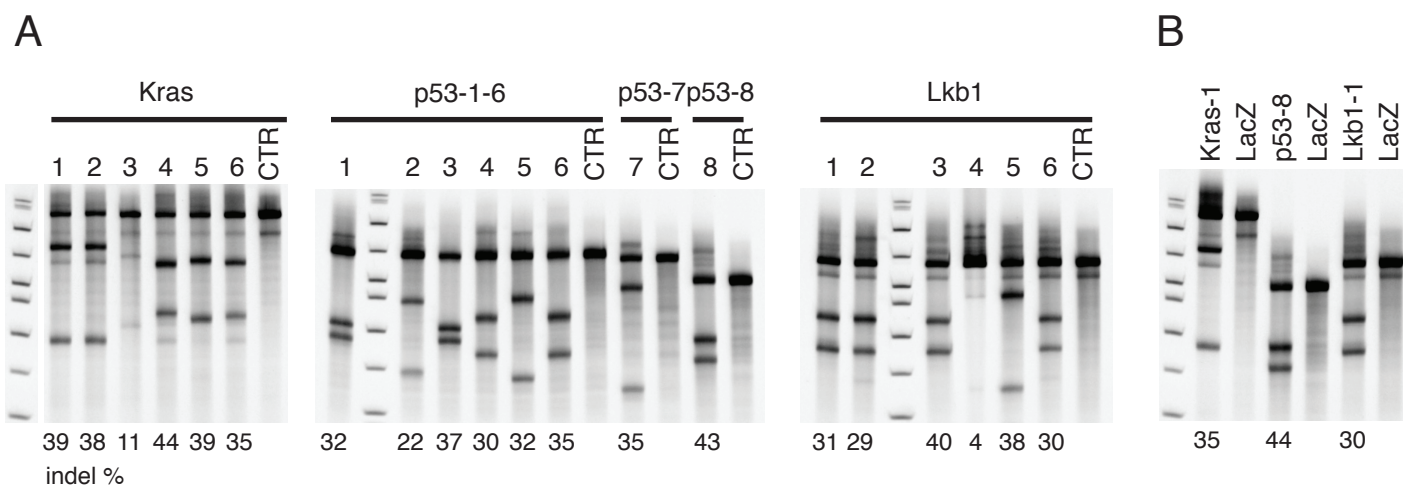

**C**

Kras locus

WT 5' GTGGTTGGAGCTGGTGGCGTAGGCAAGAGCGCCT 3'

HDR reads

- r1 GT**C**GTGGGCGCCG**A**CGGCGTGGGCAAGAGCGC**T**T
- r2 GT**C**GTGGGCGCCG**A**CGGCGTGGGCAAGAGCGC**T**T
- r3 GT**C**GTGGGCGCCG**A**CGGCGTGGGCAAGAGCGC**T**T
- r4 GT**C**GTGGGCGCCG**A**CGGCGTGGGCAAGAGCGC**T**T
- r5 GT**C**GTGGGCGCCG**A**CGGCGTGGGCAAGAGCGC**T**T
- r<sub>n</sub> G**C**CG**A**CGGCGTGGGCAAGAGCGC**T**T

WT 5' GTGGTTGGAGCTGGTGGCGTAGGCAAGAGCGCCT 3'

WT reads

- r1 GTGGTTGGAGCTGGTGGCGTAGGCAAGAGCGCCT
- r2 GTGGTTGGAGCTGGTGGCGTAGGCAAGAGCGCCT
- r<sub>n</sub> TGGAGCTGGTGGCGTAGGCAAGAGCGCCT

Figure S3
