# Supplementary material
Source: PubMed Central journal article supplement (PMC4265475)

**A**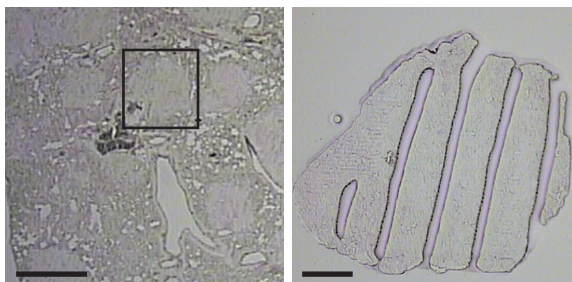**B**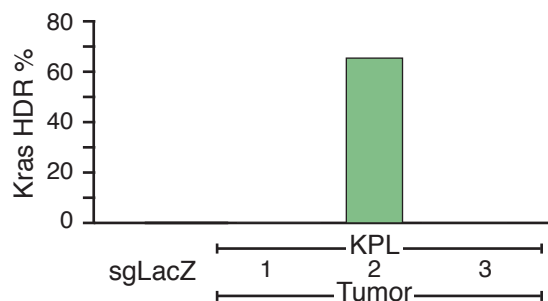**C**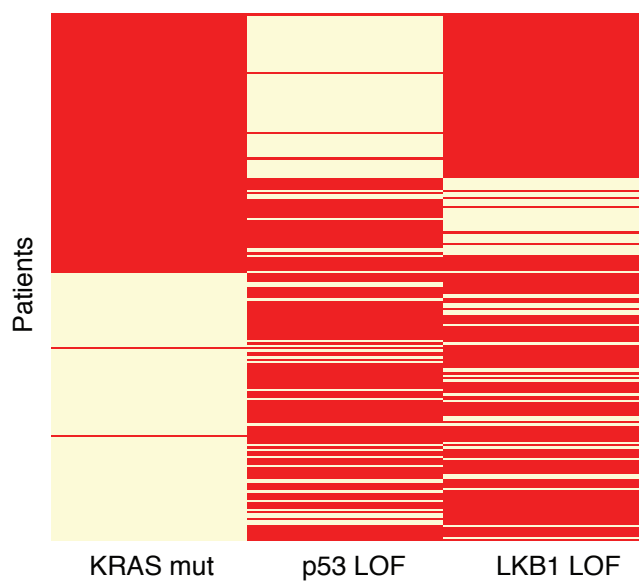**D**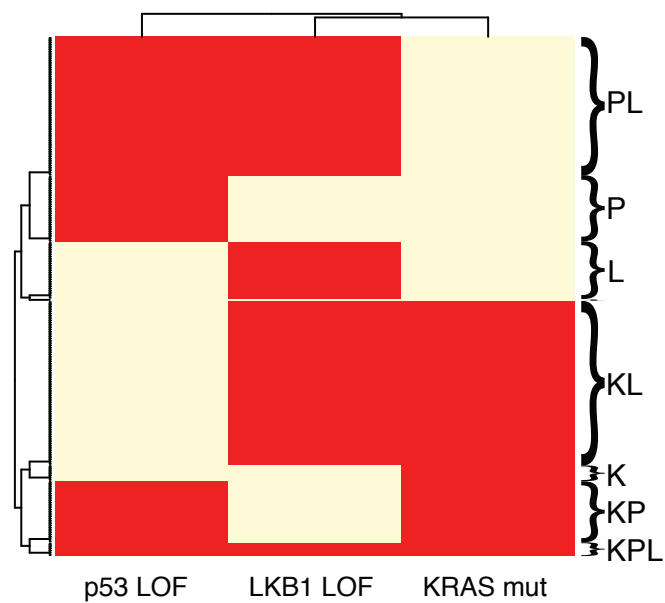

Figure S5

Supplement: NIHMS631163-supplement-10.pdf [file NIHMS631163-supplement-10.pdf]

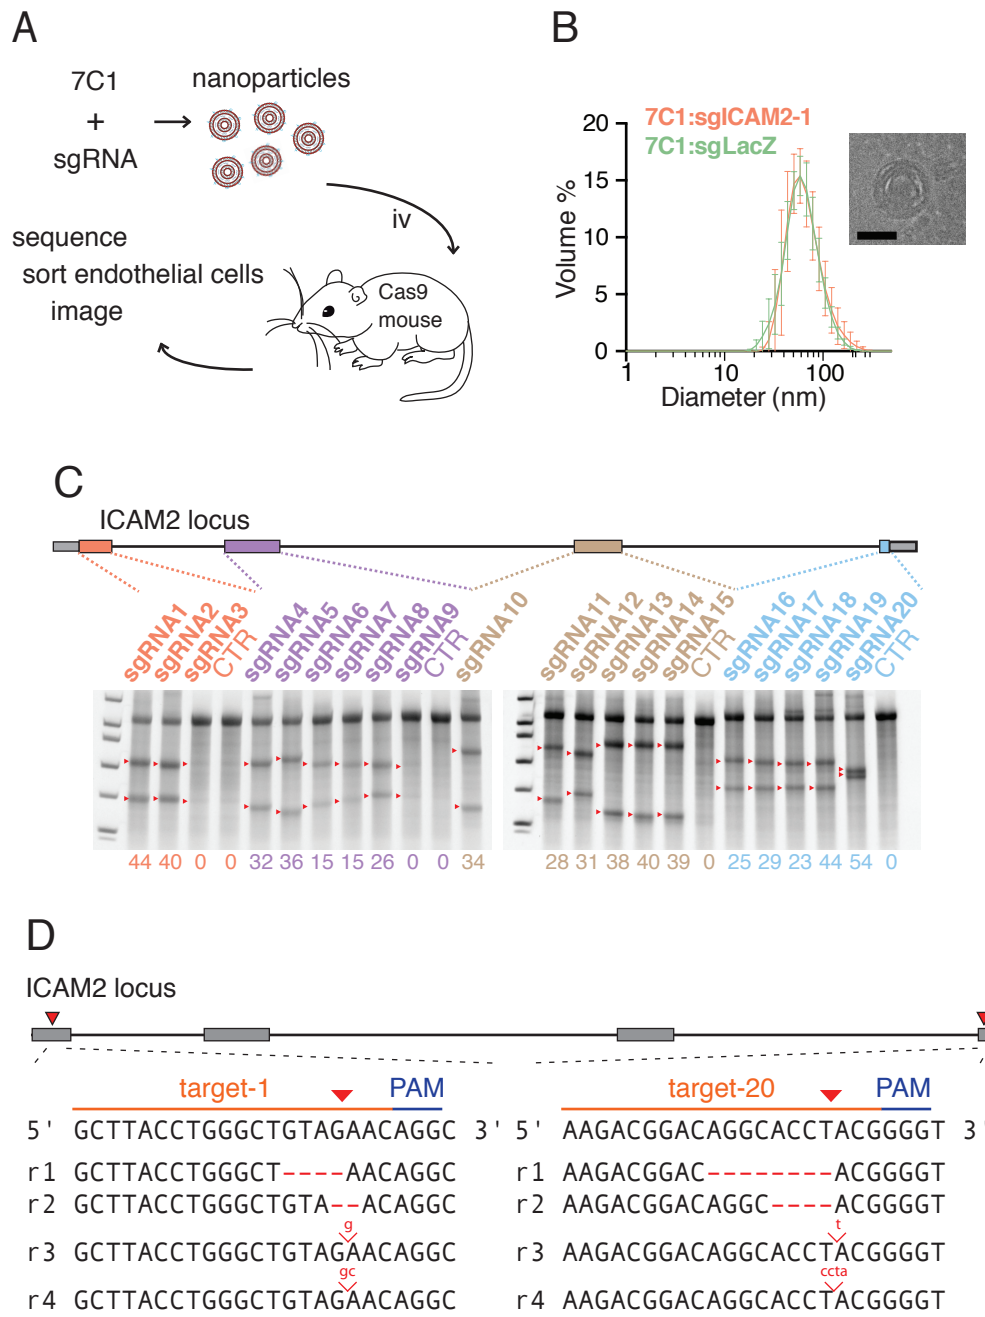

Figure S6

Supplement: NIHMS631163-supplement-11.pdf [file NIHMS631163-supplement-11.pdf]

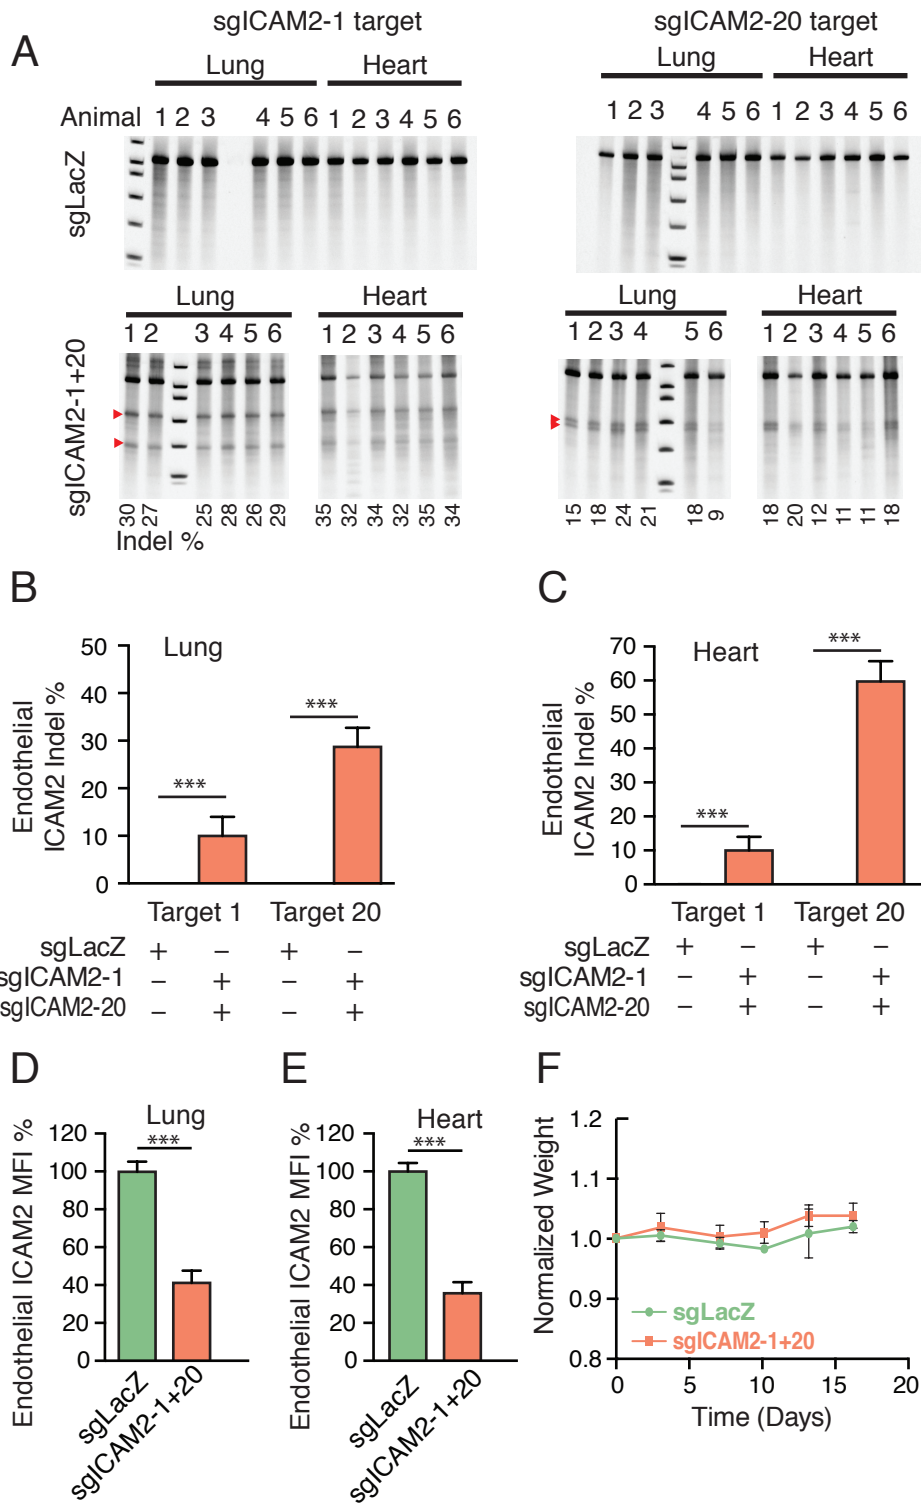

Figure S7

Supplement: NIHMS631163-supplement-12.pdf [file NIHMS631163-supplement-12.pdf]

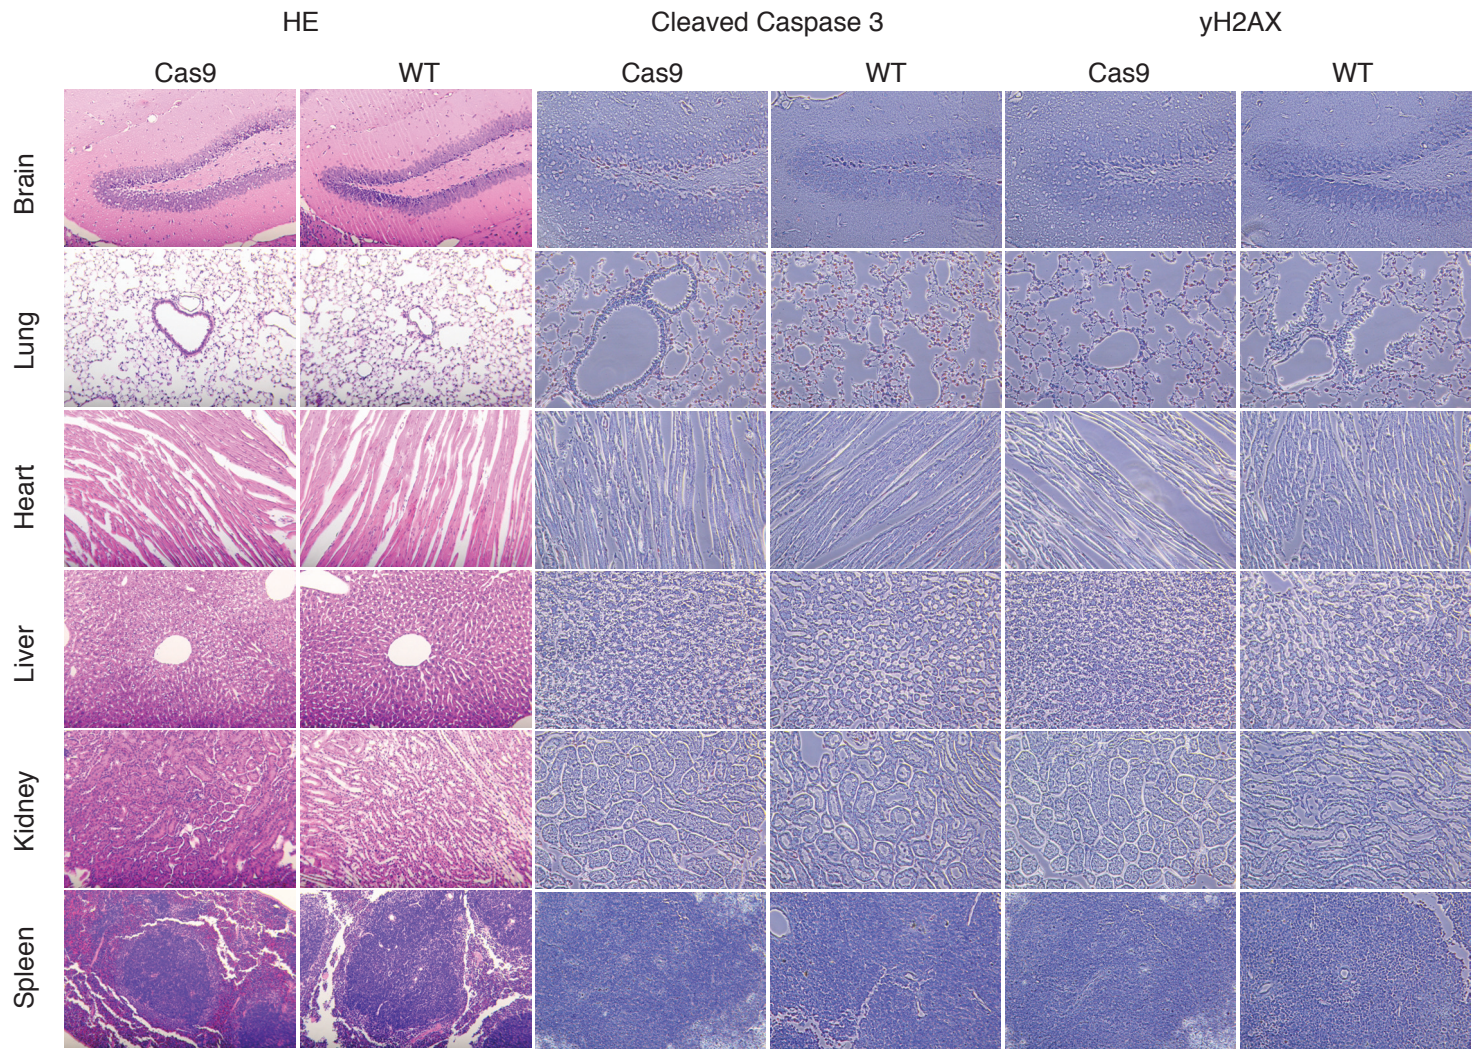

Figure S1

Supplement: NIHMS631163-supplement-6.pdf [file NIHMS631163-supplement-6.pdf]

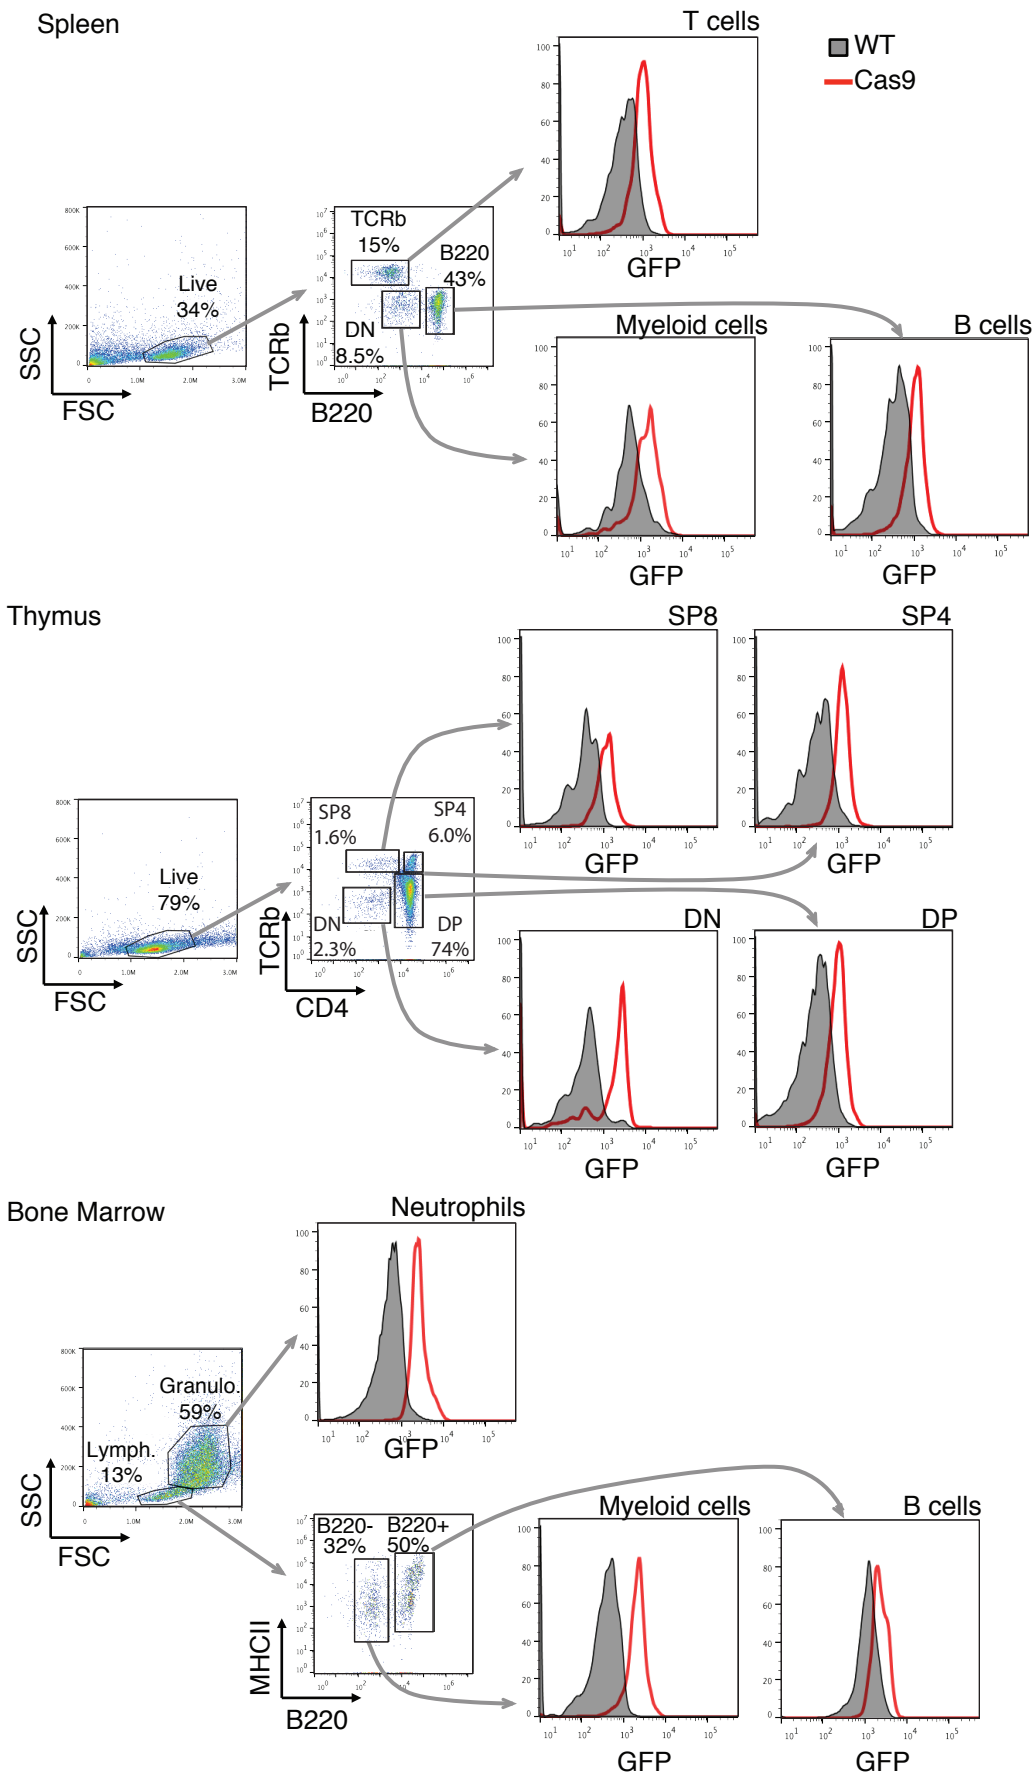

Figure S2

Supplement: NIHMS631163-supplement-7.pdf [file NIHMS631163-supplement-7.pdf]

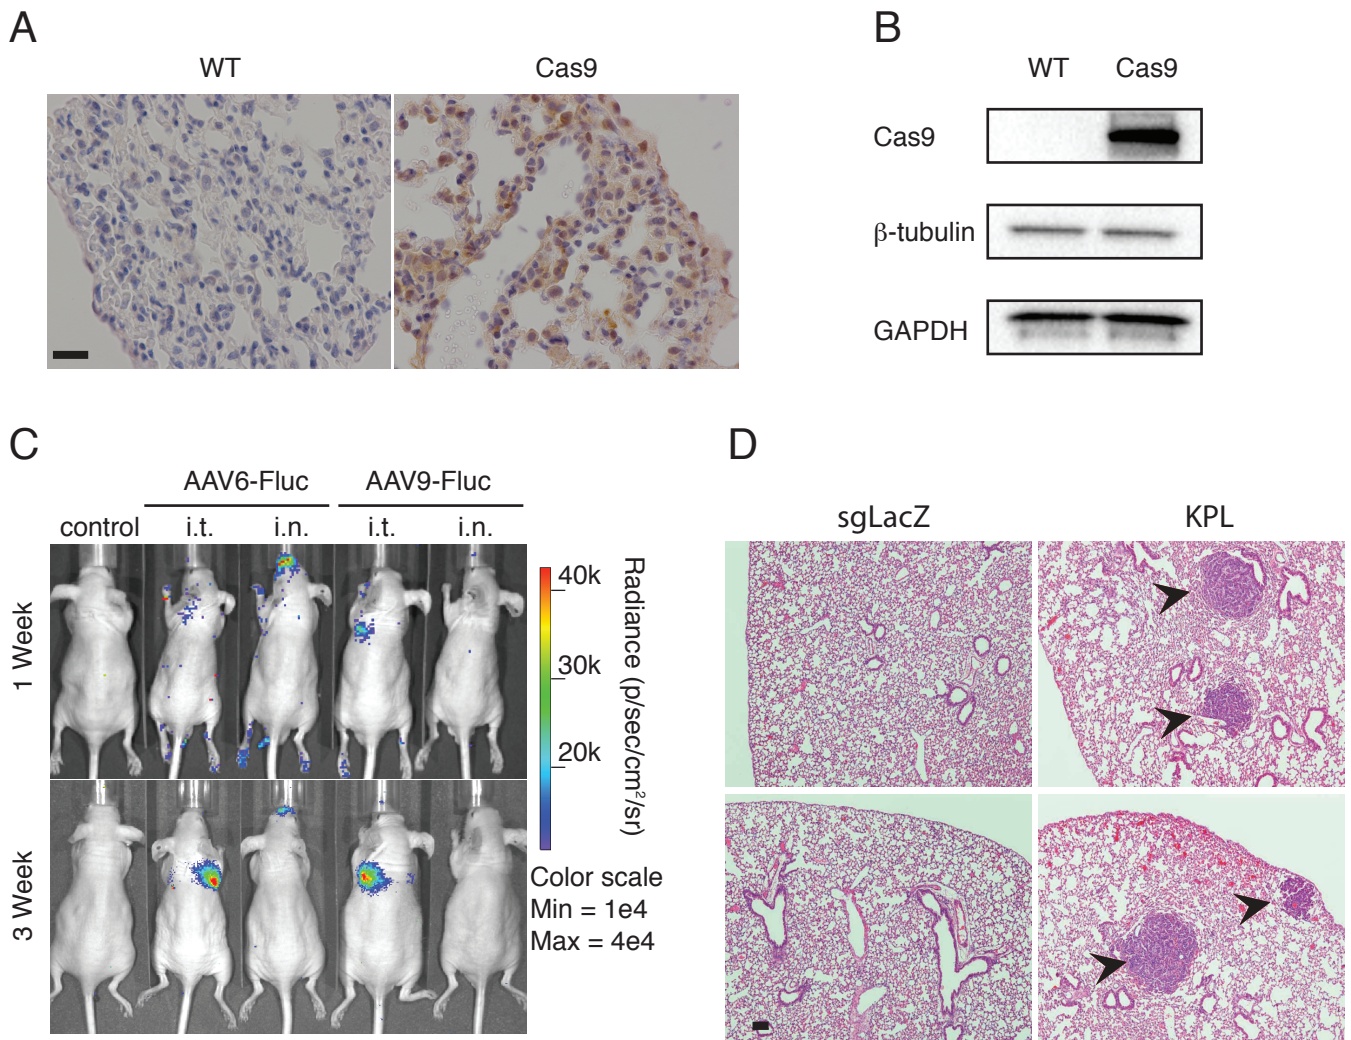

Figure S4

Supplement: NIHMS631163-supplement-9.pdf [file NIHMS631163-supplement-9.pdf]
